# Supplementary material
Source: publisher figshare collection journal article supplement (https://frontiersin.figshare.com/ndownloader/files/35095048)
Supplement: Supplementary file 1 [file 35095048]

*Supplementary to Frontiers in Earth Science*

**Tectonic juxtaposition of two independent Paleoproterozoic arcs by Cenozoic duplexing in the Arun Tectonic Window of the eastern Nepalese Himalaya**

Rui Li1,2,3,4,*, Songjian Ao5,4, Wenjiao Xiao1,2,3,4,5,*, Karel Schulmann6, Qigui Mao1,2,3,4, Dongfang Song5,4, Hao Wang1,2,3,4, Zhou Tan1,2,3,4, Saunak Bhandari 7

1 State Key Laboratory of Desert and Oasis Ecology, Xinjiang Institute of Ecology and Geography, Chinese Academy of Sciences, Urumqi 830011, China;

2 Xinjiang Key Laboratory of Mineral Resources and Digital Geology, Urumqi 830011, China;

3 University of Chinese Academy of Sciences, Beijing 100049, China

4 Innovation Academy for Earth Science, Chinese Academy of Sciences, Beijing 100029, China

5 State Key Laboratory of Lithospheric Evolution, Institute of Geology and Geophysics, Chinese Academy of Sciences, Beijing 100029, China

6 Centre for Lithospheric Research, Czech Geological Survey, Klárov 131/3, Prague, Czech Republic

7 Department of Mines and Geology, Government of Nepal, Kathmandu, Nepal

Corresponding author: Rui Li (lirui@ms.xjb.ac.cn)

Wenjiao Xiao (wj-xiao@mail.iggcas.ac.cn)

Supplementary figure


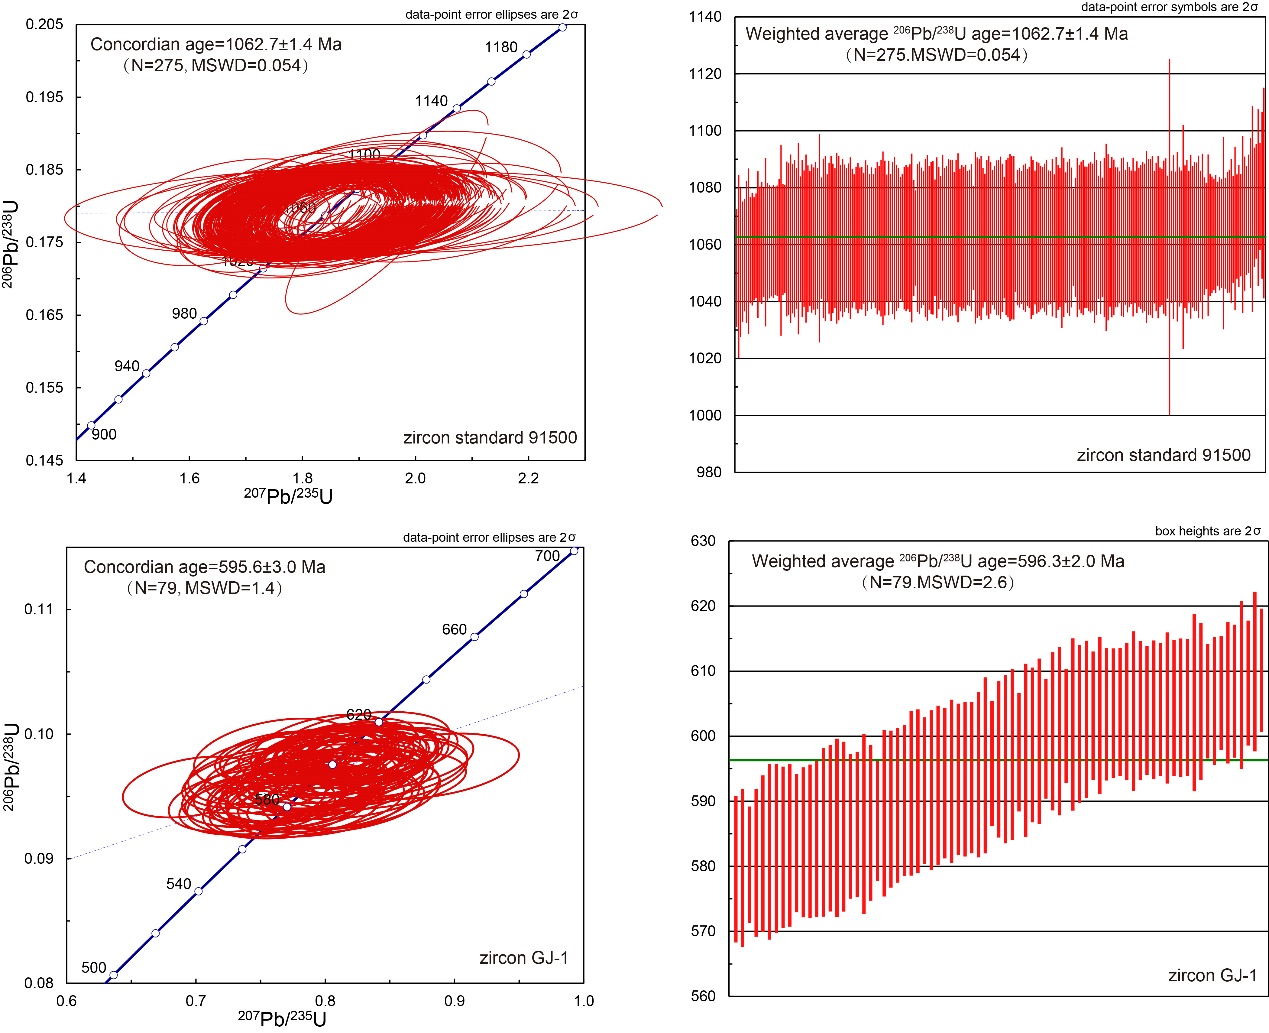
**Figure S1**. Diagrams wetherill concordia plot and weighted average plot of standard sample Zircon 91500 and GJ-1.
